# Supplementary material
Source: Springer Nature journal article supplement (https://www.springermedizin.de/resource/supplementary/13058_2012_3155_MOESM1_ESM.pdf/9703408)

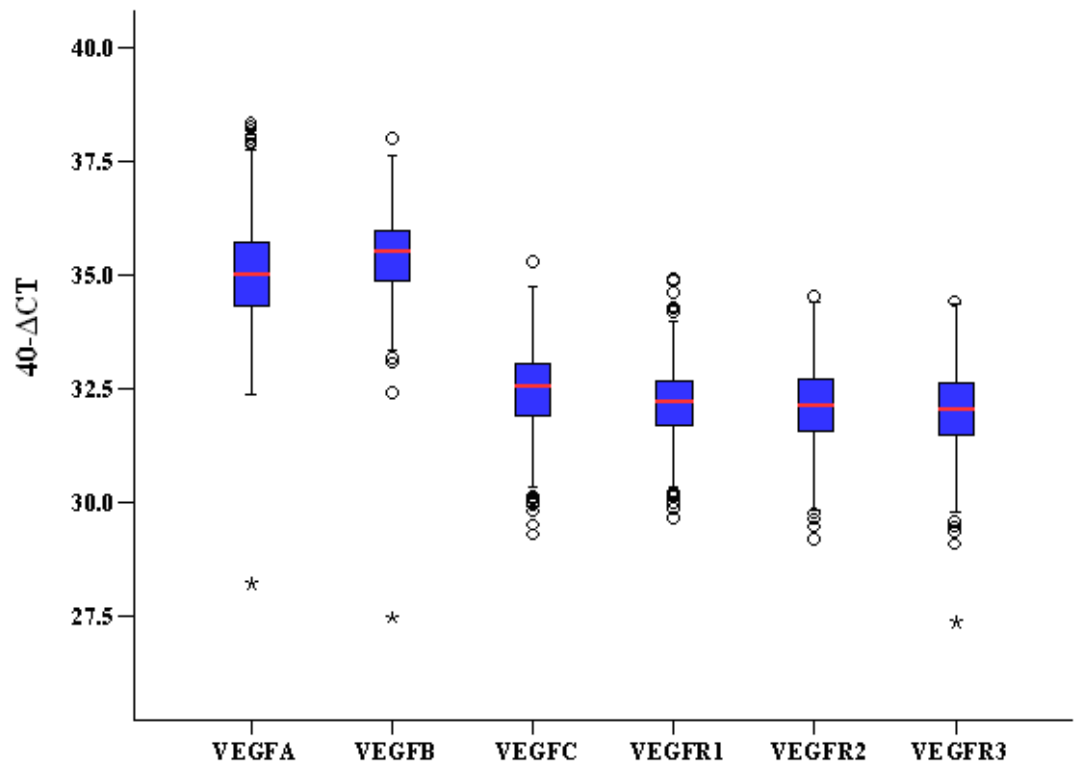

Supplement: MOESM1 [file 9703408]
